# Supplementary material
Source: publisher site journal article supplement (https://www.dovepress.com/article/419087)
Supplement: Supplementary file 1 [file get_supplementary_file.php]

## Supplementary materials

**Table 1. Univariable analyses for unfavorable outcome after EVT.**

| Variables                                  | OR (95% CI)         | <i>P</i> value |
|--------------------------------------------|---------------------|----------------|
| Age (years)                                | 1.050 (1.029-1.073) | <0.001         |
| Male, n (%)                                | 1.162 (0.720-1.881) | 0.540          |
| Medical history, n (%)                     |                     |                |
| Hypertension                               | 1.823 (1.117-3.007) | 0.017          |
| Diabetes mellitus                          | 2.262 (1.256-4.149) | 0.007          |
| Atrial fibrillation                        | 1.733 (1.084-2.783) | 0.022          |
| Hyperlipidemia                             | 0.733 (0.299-1.705) | 0.479          |
| Coronary heart disease                     | 1.391 (0.805-2.408) | 0.236          |
| Heart failure                              | 2.743 (1.217-6.610) | 0.018          |
| Smoking                                    | 0.705 (0.420-1.173) | 0.182          |
| Drinking                                   | 0.902 (0.503-1.600) | 0.725          |
| Clinical assessment                        |                     |                |
| Systolic BP (mmHg)                         | 1.010 (1.001-1.020) | 0.031          |
| Diastolic BP (mmHg)                        | 1.013 (0.997-1.030) | 0.102          |
| NIHSS score                                | 1.114 (1.072-1.161) | <0.001         |
| ASPECTS score                              | 0.715 (0.607-0.830) | <0.001         |
| Laboratory data                            |                     |                |
| White blood cell count ( $\times 10^9/L$ ) | 1.057 (0.998-1.121) | 0.061          |
| Neutrophil count ( $\times 10^9/L$ )       | 1.135 (1.065-1.214) | <0.001         |
| Lymphocyte count ( $\times 10^9/L$ )       | 0.880 (0.634-1.200) | 0.427          |
| Platelet count ( $\times 10^{12}/L$ )      | 0.998 (0.994-1.002) | 0.402          |
| C-reactive protein (mg/L)                  | 1.009 (1.003-1.017) | 0.011          |
| Fasting blood glucose (mmol/L)             | 1.153 (1.063-1.264) | 0.001          |
| Intravenous thrombolysis, n (%)            | 0.893 (0.548-1.449) | 0.648          |
| Door to puncture (min)                     | 1.001 (0.998-1.004) | 0.563          |
| Puncture to reperfusion (min)              | 1.000 (0.996-1.004) | 0.879          |
| Occlusion site, n (%)                      |                     |                |
| ICA                                        | ref                 |                |
| MCA/ACA (M1/A1)                            | 0.489 (0.303-0.785) | 0.003          |

|                                  |                      |       |
|----------------------------------|----------------------|-------|
| MCA/ACA(M2/A2)                   | 0.273 (0.013-2.198)  | 0.266 |
| ASITN/SIR 2-3, n (%)             | 0.622 (0.389-0.989)  | 0.046 |
| Type of procedure, n (%)         |                      |       |
| Stent retriever first            | 2.785 (1.113-7.981)  | 0.038 |
| Aspiration first                 | 3.026 (1.197-8.737)  | 0.027 |
| Angioplasty or stent first       | ref                  |       |
| mTICI 2b/3, n (%)                | 0.301 (0.148-0.584)  | 0.001 |
| sICH, n (%)                      | 5.065 (1.956-15.701) | 0.002 |
| Systemic inflammatory indicators |                      |       |
| NLR (%)                          | 1.065 (1.030-1.106)  | 0.001 |
| SII ( $\times 10^{12}/L$ )       | 1.000 (1.000-1.000)  | 0.010 |
| PLR (%)                          | 1.000 (0.999-1.002)  | 0.450 |

Abbreviations: ACA, anterior cerebral artery; ASITN/SIR, the American Society of Interventional and Therapeutic Neuroradiology/Society of Interventional Radiology; ASPECTS, the Alberta Stroke Program Early Computed Tomography Score; BP, blood pressure; CI, confidence interval; EVT, endovascular treatment; ICA, internal carotid artery; MCA, middle cerebral artery; mTICI, modified Thrombolysis in Cerebral Infarction Score; NIHSS, National Institute of Health Stroke Scale; NLR, neutrophil-to-lymphocyte ratio; OR, odds ratio; PLR, platelet-to-lymphocyte ratio; sICH, symptomatic intracranial hemorrhage; SII, systemic-immune-inflammation index

**Table 2. Screening results of adjusted factors in multivariable analysis of model 3.**

| <b>Variable</b>       | <b>OR (IBI as Per 1-SD increase, 95% CI)</b> | <b>P value</b> | <b>OR (IBI as Quartiles, 95% CI)</b> | <b>P value</b> |
|-----------------------|----------------------------------------------|----------------|--------------------------------------|----------------|
| Age                   | 1.046 (1.021-1.073)                          | <0.001         | 1.039 (1.015-1.065)                  | 0.002          |
| NIHSS score           | 1.081 (1.035-1.133)                          | 0.001          | 1.086 (1.04-1.136)                   | <0.001         |
| ASPECTS score         | 0.739 (0.607-0.889)                          | 0.002          | 0.736 (0.604-0.885)                  | 0.002          |
| mTICI 2b/3            | 0.326 (0.144-0.711)                          | 0.006          | 0.312 (0.137-0.680)                  | 0.004          |
| sICH                  | 4.920 (1.662-16.942)                         | 0.006          | 4.782 (1.611-16.496)                 | 0.007          |
| Fasting blood glucose | 1.079 (0.991-1.185)                          | 0.093          | 1.084 (0.993-1.191)                  | 0.081          |
| Heart failure         | 2.158 (0.826-5.906)                          | 0.122          | 2.052 (0.789-5.612)                  | 0.147          |

Abbreviations: ASPECTS, the Alberta Stroke Program Early Computed Tomography Score; CI, confidence interval; mTICI, modified Thrombolysis in Cerebral Infarction Score; NIHSS, National Institute of Health Stroke Scale; NLR, neutrophil-to-lymphocyte ratio; OR, odds ratio; sICH, symptomatic intracranial hemorrhage.
